# Supplementary material for: Nucleologenesis and embryonic genome activation are defective in interspecies cloned embryos between bovine ooplasm and rhesus monkey somatic cells
Source: PubMed Central journal article supplement (PMC2734572; doi:10.1186/1471-213x-9-44), 2009-07-28
Supplement: 1471-213X-9-44-S1.pdf [file 1471-213X-9-44-S1.pdf]

**Additional file 1. Comparison of developmental capacity of iSCNT embryos by different culture media**

| Group        | No. of embryos cultured | No. (%) of embryos developed to |              |               |          |                 |
|--------------|-------------------------|---------------------------------|--------------|---------------|----------|-----------------|
|              |                         | Day 3                           |              |               |          | Day 7           |
|              |                         | 2-cell                          | 4-cell       | 8-16cell      | Cleavage | Blastocyst rate |
| CR1-aa       | 57                      | 3 (7.7±3.7)                     | 5 (8.2±1.6)  | 45 (76.4±3.6) | 90.1±2.3 | -               |
| IVC-1,3      | 55                      | 5 (13.3±4.5)                    | 7 (17.7±4.3) | 35 (54.6±6.3) | 86.9±2.7 | -               |
| G1,2         | 24                      | 3 (12.5±0)                      | 6 (21.9±3.6) | 10 (43.8±3.0) | 78.1±2.1 | -               |
| Complete 1,2 | 23                      | 2 (10.0±3.8)                    | 3 (12.7±2.0) | 14 (59.6±3.4) | 82.3±1.8 | -               |
